# Supplementary material
Source: Springer Nature journal article supplement (https://www.springermedizin.de/resource/supplementary/12985_2007_297_MOESM3_ESM.pdf/9607734)
Supplement: MOESM3 [file 9607734]

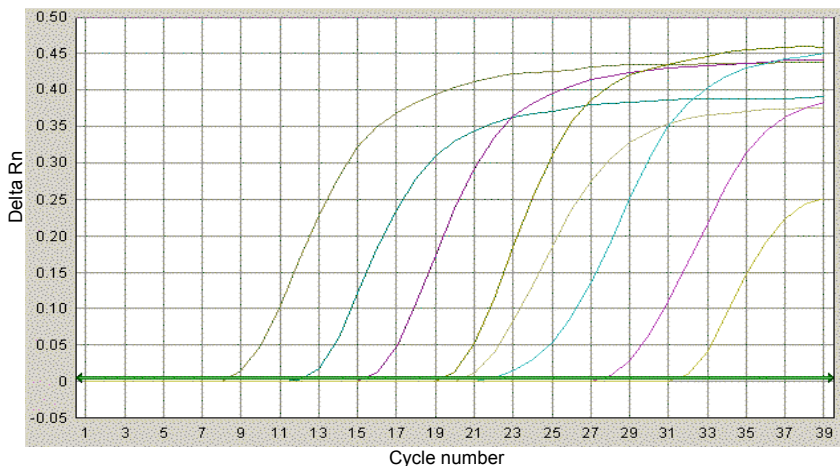

Copy number of  
PtroLCV1 template

$10^6$   $10^5$   $10^4$   $10^3$

without  
PtroLCV1-LNA

$10^6$   $10^5$   $10^4$   $10^3$

with  
PtroLCV1-LNA

**A**

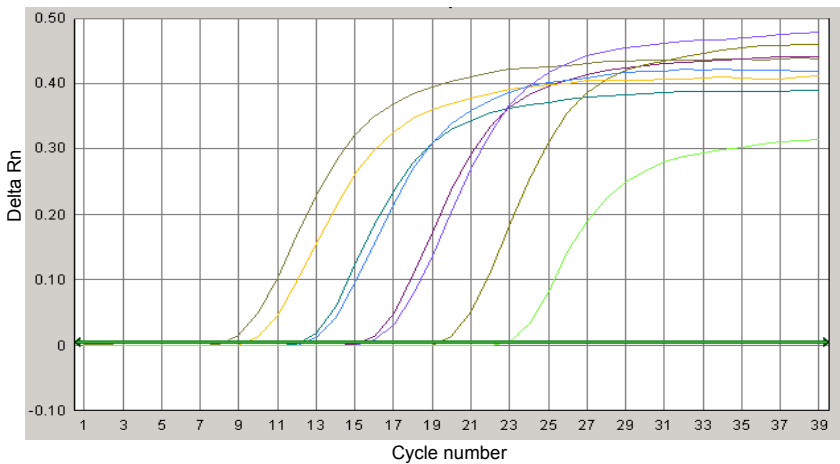

Copy number of  
PtroLCV1 template

$10^6$   $10^5$   $10^4$   $10^3$

without  
EBV-LNA

$10^6$   $10^5$   $10^4$   $10^3$

with  
EBV-LNA

**B**
